# Supplementary material for: Non-Invasive Quantification of Layer-Specific Intrinsic Fluorescence From Mucosa of the Uterine Cervix Using Monte-Carlo-Based Models
Source: Frontiers journal article supplement (doi:10.3389/fphy.2022.865421), 2022-06-13
Supplement: Data_Sheet_1.docx [file Data_Sheet_1.docx]

**Supplementary Material**

Details of verifying the developed system and models with experimental data are described as follows.

1. Fluorescence spectra measured by the movable spectroscopy system and calibrated by the calibration procedure were compared to simulated spectra obtained using the fluorescence Monte Carlo model. The phantom composition is described in Table S1. Results of calibrating fluorescence spectra measured from A2 using A1, A3, and A4 for calibration show a root-mean-square spectral error of about 10%.

**Table S1 Single fluorophore tissue-mimicking phantom**

| Phantom No. |  | Hb(g/L) | Fluorescein() | Stibene() |
| --- | --- | --- | --- | --- |
| A1 | 0.04853 | 0.746 | 0.1 | 2 |
| A2 | 0.0364 | 0.373 | 0.1 | 0.5 |
| A3 | 0.04853 | 0.373 | 0.01 | 0.1 |
| A4 | 0.0364 | 0.746 | 0.02 | 0.15 |

1. Validation of the proposed inverse DRS and fluorecence models with tissue-mimicking phantoms containing two fluorophores

We performed two-fluorophore phantom experiments to verify the developed models and system. Details have been presented in a conference without being published in proceedings. Therefore, they are summarized as follows:

We used two fluorescent substances (Figure S1) to make phantoms (Table S2). Phantoms were divided into three groups including the calibration group (CAL), testing group one (T1) and testing group two (T2). Diffuse reflectance spectra were measured, calibrated, and fitted by the proposed method to obtain a() and s(), assuming the wavelength dependence of ink absorption is known. The final results of T1 and T2 are in Table S3. The is the ratio of to . As in Eq. (4), the and are the fluorescence efficiency of stilbene and fluorescein, respectively. The and are percentage errors of iteratively fitted and , respectively. and are percentage errors of extracted and , respectively. In T1, both and were less than 6%. We regarded these as experimental errors. In T2, both and increased as the concentrations of the fluorophores decreased. These possibly resulted from decreased fluorophore concentrations and thus, lower signal-to-noise ratios in measured spectra. The larger error in estimated fluorescein concentration was partly attributed to a smaller contribution of fluorescein to the total fluorescence intensity. We indicated this factor by . For instance, when was 8.9, was 16.6%; when increased to 12.5 with the concentration of fluorescein reduced by 43%, increased to 44.9%.

**
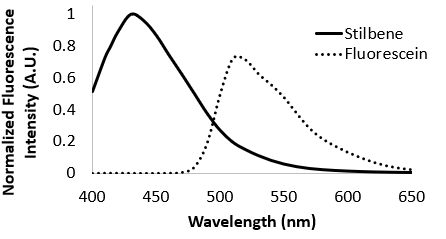
Figure S1 Normalized fluorescence emission spectra of fluorescein and stilbene at the same absorption coefficient of the fluorophores.**

**Table S2 Wavelength dependent optical properties of two-fluorophore phantoms (unit: 1/cm)**

| No. | | 365 nm | | | | | 400 – 650 nm (average) | | | | |
| --- | --- | --- | --- | --- | --- | --- | --- | --- | --- | --- | --- |
|  | | Ink | Fluorescein | Stilbene |  | | Ink | Fluorescein | Stilbene |
|  |  |  |  |  |  |  |  |  |  |
| CAL | 1 | 204 | 0.36 | 1.76 |  |  | 107 | 0.25 | 1.33 |  |  |
| 2 |  |  |  |  |
| 3 |  |  |  |  |
| 4 |  |  |  |  |
| T1 | 5 | 117 | 0.20 | 1.65 |  |  | 61 | 0.14 | 1.25 |  |  |
| 6 | 2.75 | 2.08 |
| 7 | 272 | 0.48 | 1.65 | 142 | 0.33 | 1.25 |
| T1/  T2 | 8 | 2.75 | 2.08 |
| T2 | 9 | 272 | 0.48 | 2.75 |  |  | 142 | 0.33 | 2.08 |  |  |
| 10 |  |  |  |  |
| 11 |  |  |  |  |

The ink is Black ink. (India Ink, NENN YIH CO.)

**Table S3 Result of two-fluorophore phantom experiments from T1 and T2.**

| No. | |  | (%) | (%) | (%) | (%) |
| --- | --- | --- | --- | --- | --- | --- |
| T1 | 5 | 4.9 | 4.1 | -2.5 | -7.5 | -4.7 |
| 6 | 4.9 | 6.3 | -5.2 | -6.5 | -1.2 |
| 7 | 4.9 | -0.5 | -1.4 | -8.1 | -7.0 |
| T1/  T2 | 8 | 4.9 | 4.0 | -3.5 | -8.9 | -7.5 |
| T2 | 9 | 5.6 | 5.5 | -2.7 | -2.6 | -2.2 |
| 10 | 8.9 | 4.1 | -1.4 | 16.6 | -5.9 |
| 11 | 12.5 | 4.8 | -2.0 | 44.9 | -9.4 |
